1  
2  
3  
4  
5  
6  
7  
8  
9  
10  
11  
12  
13  
14  
15  
16  
17  
18  
19  
20  
21  
22  
23  
24  
25  
26  
27  
28  
29  
30  
31  
32  
33  
34

# Phenotypic plasticity, life cycles, and the evolutionary transition to multicellularity

Si Tang<sup>1\*</sup>, Yuriy Pichugin<sup>2,3\*</sup>, Katrin Hammerschmidt<sup>1</sup>

<sup>1</sup> Institute of General Microbiology, Kiel University, Kiel, Germany

<sup>2</sup> Department of Evolutionary Theory, Max Planck Institute for Evolutionary Biology, Plön, Germany.

<sup>3</sup> present address: Department of Ecology and Evolutionary Biology, Princeton University, Princeton NJ, USA.

\*These authors contributed equally to this work.

Author ORCIDs

Katrin Hammerschmidt <https://orcid.org/0000-0003-0172-8995>

Yuriy Pichugin: <https://orcid.org/0000-0003-3078-2499>

Correspondence and requests for materials should be addressed to KH and YP  
[katrinhammerschmidt@googlemail.com](mailto:katrinhammerschmidt@googlemail.com)  
[pichugin@princeton.edu](mailto:pichugin@princeton.edu)

## Classification

BIOLOGICAL SCIENCES: Evolution

## Keywords

cyanobacteria, filaments, phenotypic switch, evolutionary transitions in individuality

## 35 **SUMMARY**

36 Understanding the evolutionary transition to multicellularity is a key problem in evolutionary  
37 biology (1,2). While around 25 independent instances of the evolution of multicellular  
38 existence are known across the tree of life (3), the ecological conditions that drive such  
39 transformations are not well understood. The first known transition to multicellularity occurred  
40 approximately 2.5 billion years ago in cyanobacteria (4–6), and today's cyanobacteria are  
41 characterized by an enormous morphological diversity, ranging from single-celled species  
42 over simple filamentous to highly differentiated filamentous ones (7,8). While the  
43 cyanobacterium *Cyanothece* sp. ATCC 51142 was isolated from the intertidal zone of the  
44 U.S. Gulf Coast as a unicellular species (9), we are first to additionally report a  
45 phenotypically mixed strategy where multicellular filaments and unicellular stages alternate.  
46 We experimentally demonstrate that the facultative multicellular life cycle depends on  
47 environmental conditions, such as salinity and population density, and use a theoretical  
48 model to explore the process of filament dissolution. While results predict that the observed  
49 response can be caused by an excreted compound in the medium, we cannot fully exclude  
50 changes in nutrient availability (as in (10,11)). The best fit modeling results demonstrate a  
51 nonlinear effect of the compound, which is characteristic for density-dependent sensing  
52 systems (12,13). Further, filament fragmentation is predicted to occur by means of  
53 connection cleavage rather than by cell death of every alternate cell. The phenotypic switch  
54 between the single-celled and multicellular morphology constitutes an environmentally  
55 dependent life cycle, which likely represents an important step en route to permanent  
56 multicellularity.

57

## 58 **RESULTS**

59 To investigate the environmental factors that favor a multicellular morphology, we exposed  
60 the single-celled cyanobacterium *Cyanothece* sp. ATCC 51142 (hereafter *Cyanothece* sp.;  
61 Figure 1A) to the range of salinities and population densities it would encounter at its  
62 isolation site, the intertidal zone of the U.S. Gulf Coast (9). When culturing replicate  
63 populations of *Cyanothece* sp. ( $5 \times 10^5$  cells/mL) in media with different amounts of added  
64 NaCl (0 - 300 mM), we observed that the occurrence of a filamentous morphology after 48  
65 hours (Figure 1A) significantly depends on the salinity of the medium (ANOVA,  $F_{10,32} =$   
66  $953.10$ ,  $P < 0.0001$ ). More specifically, at 0 mM NaCl, the whole population displayed a  
67 filamentous morphology, ranging from 4-celled up to 16-celled filaments, whereas at 300 mM  
68 NaCl (30 PSU), the whole population was single-celled. At intermediate salinities, we always  
69 observed both types - 4-celled filaments and single cells - with a higher fraction of filaments  
70 up to 90 mM NaCl, whereas at higher salinities single cells represented the most dominant

71 morphology. Notably we found that populations with a higher fraction of filaments also  
 72 contain higher cell numbers/mL (ANOVA,  $F_{1,32} = 11.658$ ,  $P=0.0018$ ).

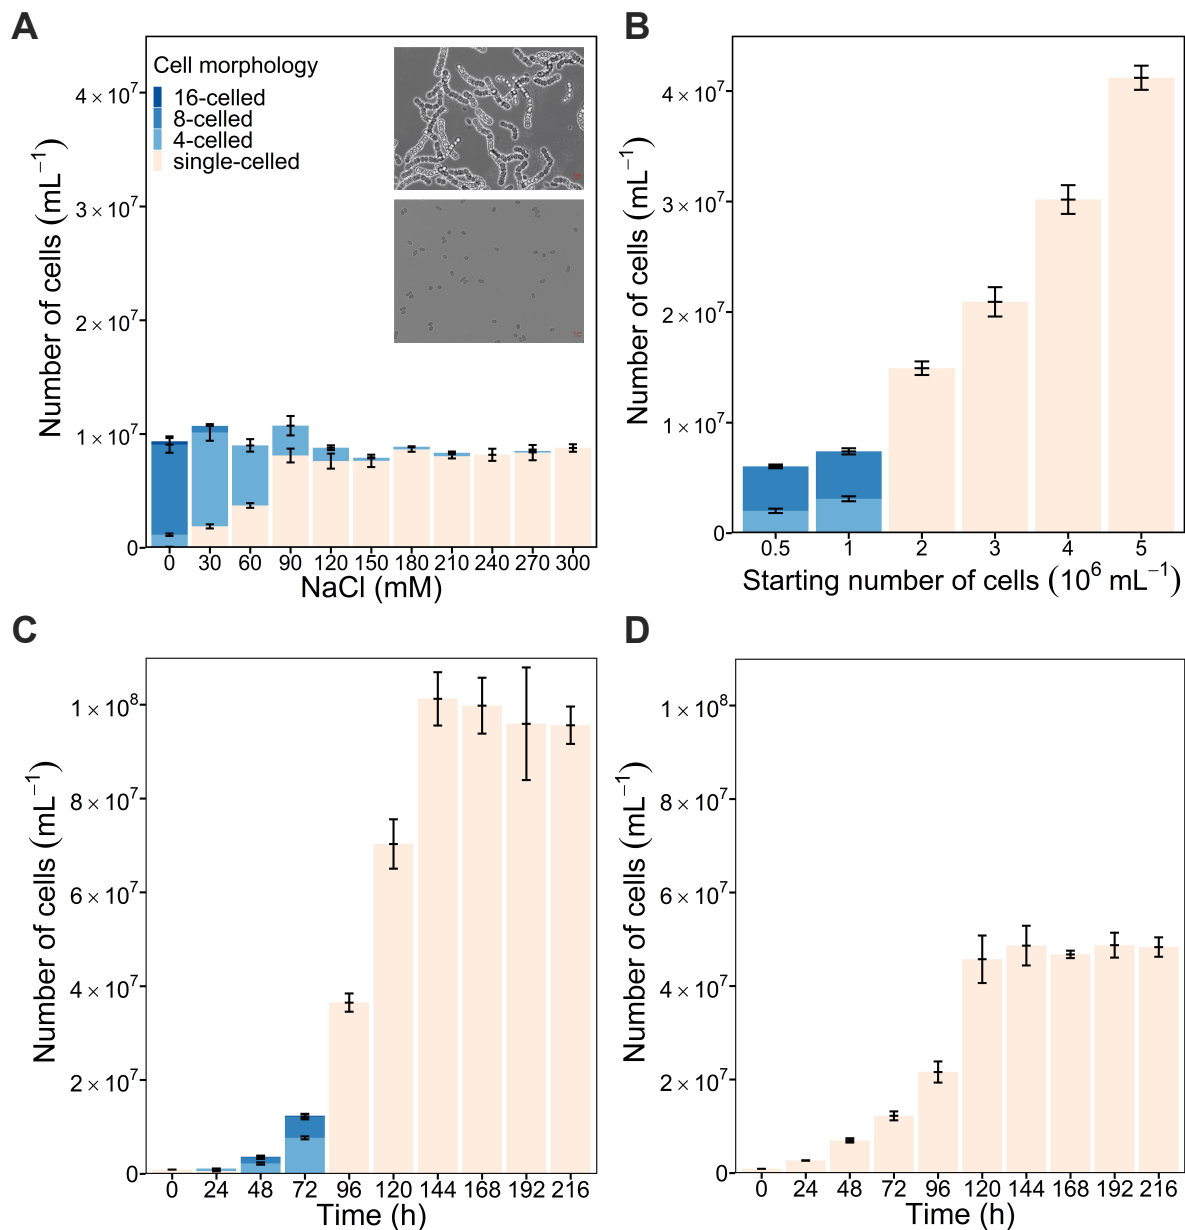

73  
 74 **Figure 1** Filamentous morphology of *Cyanothecce sp.* ATCC 51142 depends on environmental  
 75 salinity (at 48h) (A), population density (at 48h; in BG11 without added NaCl) (B), varies over time  
 76 in batch culture (in BG11 without added NaCl) (C), and is not observed over time in BG11 with  
 77 added NaCl (300 mM) (D). All experiments were performed in 10 mL media. Error bars represent  
 78 standard deviation (of each sub-bar for A-C) (n=3).

79 Next we addressed the role of population density for filament formation (in BG11 media  
 80 without added NaCl). Replicate populations were initiated with six different starting  
 81 population densities (all stemming from the same culture), ranging from  $5 \times 10^5$  –  $5 \times 10^6$   
 82 cells/mL. We found that starting cell density was a good predictor of *Cyanothecce sp.*'s  
 83 morphology – after 48 hours we only detected filaments in cultures initiated with low-density,

84 whereas when initiated with higher starting cell densities ( $\geq 2 \times 10^6$  cells/mL), we did not  
85 observe filaments (Figure 1B,  $X^2 = 16.89$ , d.f. = 5,  $P = 0.0047$ ).

86 To evaluate the effect of population density on population composition in more detail, we  
87 followed replicate populations inoculated with single-celled *Cyanothece* sp. of the low-density  
88 populations ( $5 \times 10^5$  cells/mL) in 0 mM NaCl media for 5 days (Figure 1C). Already, after 24  
89 hours, we detected first 4-celled filaments. Thereafter, the whole population became  
90 filamentous, composed mostly of 4-celled and 8-celled filaments at 48h, and of 4-celled, 8-  
91 celled, and 16-celled filaments 72 hours post inoculation. Subsequently, the elongation of the  
92 filaments stopped, and from 96 hours post inoculation onwards, we only observed single  
93 cells. We found that populations displaying the transient filamentous morphology grew faster  
94 and reached higher cell densities as compared to populations that only occur in the single-  
95 celled stage throughout their growth cycle (Figure S1; Figure 1D; ANOVA,  $F_{1,5} = 331.38$ ,  
96  $P < 0.0001$ ). Note that the population composition differed depending on the volume of the  
97 media; the previously described replicate populations were cultured in 10 mL each. While the  
98 same pattern and change between single cells and filaments was observed in volumes of 1  
99 mL each, filaments were present for shorter times so that populations contained single cells  
100 already at 72 hours post inoculation (Figure S2).

#### 101 **Cyanobacterial morphology switches are mediated by external cues**

102 The results so far indicate that the observed switches between single cells and filaments and  
103 back are density dependent - at higher cell densities, filamentation is inhibited and filament  
104 fragmentation is induced. This might be mediated by mechanisms of direct cell-cell contact or  
105 through depleted or excreted compounds in the medium. To test this, we harvested both  
106 supernatants from cultures inoculated with higher starting cell densities ( $5 \times 10^6$  cells/mL) that  
107 did not produce filaments (filament inhibitor; harvested at 24 hours after inoculation, Figure  
108 1B), and supernatants from cultures inoculated with low cell densities ( $5 \times 10^5$  cells/mL)  
109 directly after filament fragmentation (filament fragmentor; harvested at 96 h, Figure 1C). To  
110 test whether compound (i.e. nutrient) depletion hinders filamentation, we added fresh culture  
111 medium (BG11) to both supernatants and to ddH<sub>2</sub>O, creating BG11 dilutions from 0 – 100%  
112 with 20% increments. Whereas we observed filaments at low media concentrations in ddH<sub>2</sub>O  
113 (20% BG11, Table S1), we needed to add more BG11 to the two supernatants (60%, 80%  
114 BG11) to observe the multicellular morphology. As the lowest nutrient levels are found in the  
115 20% BG11:ddH<sub>2</sub>O mixture, where filament formation was observed (in contrast to the 60%  
116 and 80% BG11:supernatant mix), an overall depletion of nutrients as the factor hindering  
117 filamentation, can be excluded. This notion is supported by the growth trajectory of single  
118 cells after fragmentation (Figure 1C), which show that cells can still reproduce (in fact they  
119 display the shortest generation time in the period directly after fragmentation, see Figure S1)

120 and reach a high final concentration in the media post-fragmentation, and so strongly  
121 indicates that the post-fragmentation media (i.e. filament fragmentor) contains sufficient  
122 nutrients for growth. This can also be seen in the results from the density dependent  
123 experiment (Figure 1B), which show that when starting with  $5 \times 10^6$  cells/mL, the cell density  
124 reached  $\sim 4.1 \times 10^7$  cells/mL after 48 hours. Note that while we demonstrate that post-  
125 fragmentation media contains sufficient nutrients for growth, we cannot fully exclude the  
126 depletion of a specific compound required for maintaining growth in the filamentous form.

127 The harvested supernatants were also added to cultures of low-density single cells and to 48  
128 hours-old filaments and compared to a control, i.e. fresh culture medium (BG11 without the  
129 addition of NaCl). After 24 hours of incubation, we observed that both single cells and  
130 filaments displayed a different behavior when exposed to the two types of supernatants as  
131 compared to the control (Figure 2, ANOVA,  $F_{3,35} = 12.25$ ,  $P < 0.0001$ ). While in the control,  
132 single cells formed filaments and filaments did not fragment, both supernatants inhibited  
133 filament formation from single cells, and also led the filaments to fragment. This strongly  
134 suggests that the phenotypic change is not related to direct cell-cell contact, but that  
135 substances or the depletion of substances in the supernatant affect the transition between  
136 both phenotypes. Interestingly, both supernatants can be used interchangeably – both are  
137 able to inhibit filament formation from a single-celled ancestor and are also able to induce  
138 filament fragmentation. However, whether both supernatants contain or lack an identical  
139 substance needs to be investigated.

140 As we only observed comparatively short filaments, i.e. with a maximum of 16 cells, before  
141 they disintegrated, we investigated whether this is due to culture density (mediated by  
142 substances or the lack of substances within the supernatant) or whether it is also modulated  
143 by other factors that might constrain filament length. To test this, we diluted cultures  
144 containing filaments at 72 h by adding fresh culture media. We found that in diluted cultures,  
145 filaments increase in lengths (Figure S3), indicating that the density of the culture affects  
146 filament length.

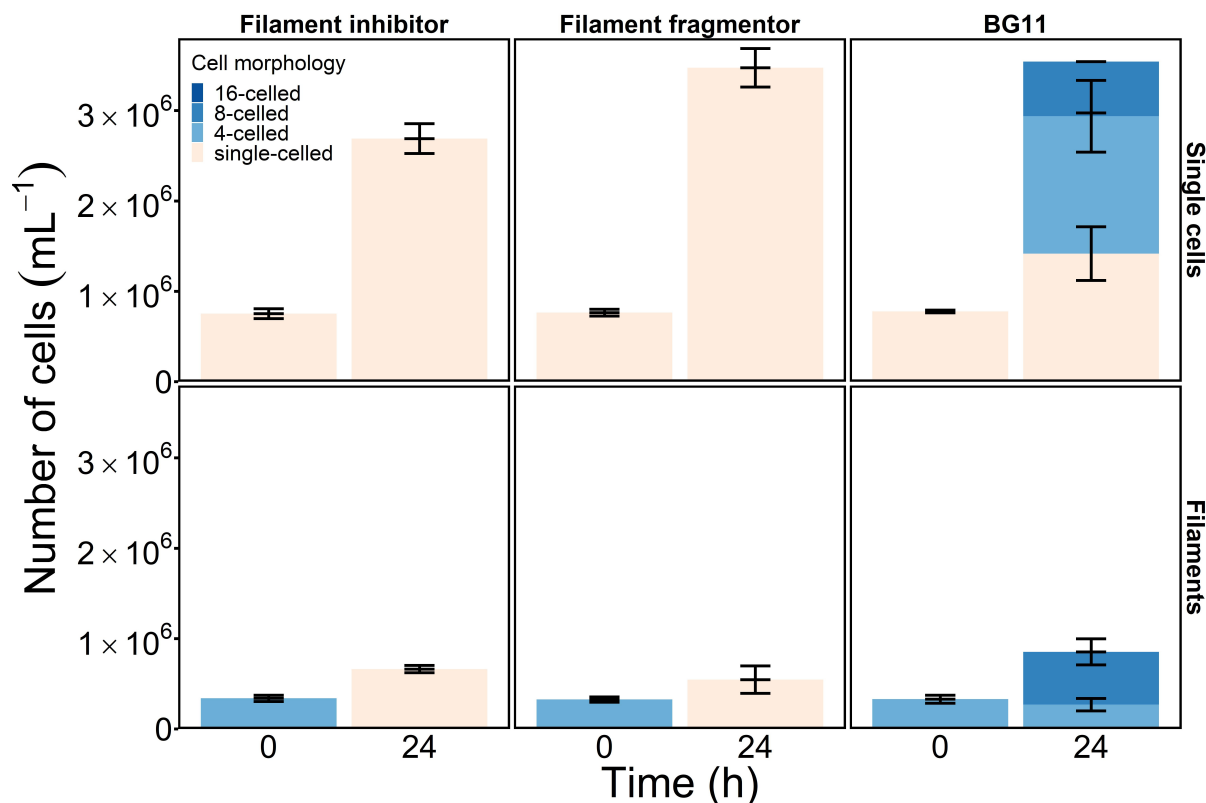

147

148 **Figure 2 Cell morphology depends on the external medium. Filament inhibitor and fragmentor**  
 149 **supernatants stop the formation of filaments from single cells, and lead to the dissolution of**  
 150 **existing filaments within 24 hours of exposure. This is in contrast to the control, untreated**  
 151 **freshwater medium (BG11), which induces filament formation from single cells and filament**  
 152 **elongation. Error bars represent standard deviation of each sub-bar (n=3).**

### 153 **Mechanisms of filament dissolution and compound action**

154 We use the collected data to fit a series of models to compare different hypotheses regarding  
 155 (i) the mechanism of filament dissolution, i.e. cell death or cleavage of the connection sites,  
 156 and (ii) the dynamics of the compound, i.e. whether the observed pattern is caused by the  
 157 accumulation or consumption of a compound. The theoretical modeling approach allows us  
 158 to explore a much wider set of parameters in different combinations as compared to  
 159 empirical work.

160 We consider three families of models. The first family, the *toxic compound models*, assumes  
 161 that cells produce a compound inducing cell death leading to the fragmentation of filaments.  
 162 The second family, the *disconnecting compound models*, assumes that cells produce a  
 163 compound inducing a cleavage of connections between cells. The third family is  
 164 complimentary to the previous one: these models also assume that filaments fragment due to  
 165 connections loss, which is caused by a consumption of an initially present compound that  
 166 stabilizes connections. To highlight this complementarity, this family is referred to as  
 167 *connecting compound models*. In each family, we consider a number of models, which differ  
 168 by the character of the compound action (rate of cell death or connection loss) with respect  
 169 to the compound concentration. For example, we compare individual models, where the

170 action rate proportionally depends on the concentration, with step-dependence models,  
171 where the compound has no effect at concentrations below a certain threshold. In total, we  
172 considered 12 models each for the toxic and disconnecting compounds, and 8 models for the  
173 connecting compound (see Figures S4, and S5, Tables S2 and S3 for the complete list).  
174 We found that (dis-)connecting models in which fragmentation is caused by the loss of cell  
175 connections fit better than the toxic compound models resulting in cell death (Figure 3A).  
176 Thus, we conclude that the observed population dynamics is likely a result of cells  
177 disconnecting with each other.

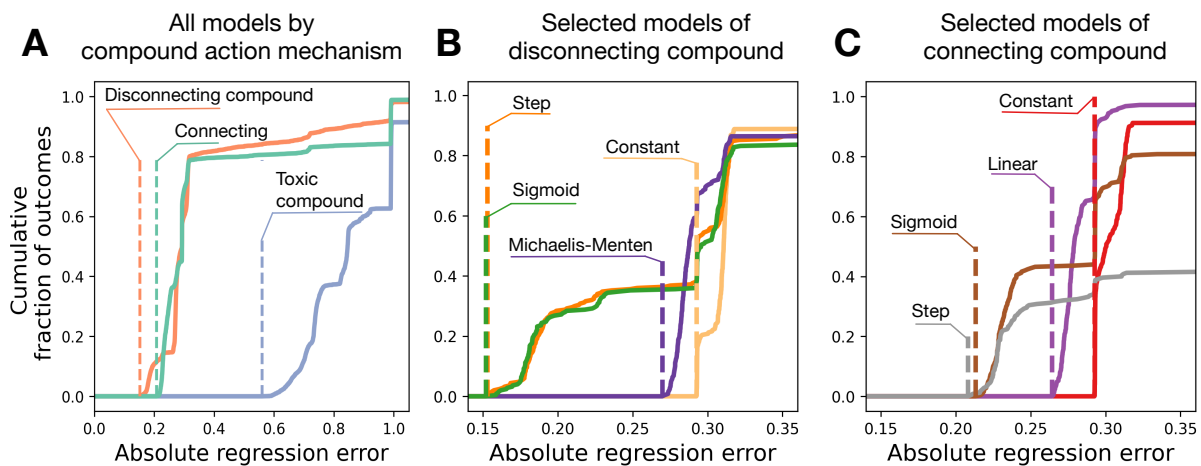

178

179 **Figure 3 The mechanism of filament dissolution is likely the cleavage of cell connections (A) with a**  
180 **strong non-linear response to active substance concentrations (B, C), as suggested by modeling.**  
181 Plots show sample cumulative distribution functions of regression errors from 250 independent  
182 optimizations for each model. Dashed lines represent the minimal regression error in each group. **(A)**  
183 Models in which connections are destroyed due to production (orange, 12 models in total) or  
184 consumption (green, 8 models) of a (dis)connecting compound provide much smaller regression  
185 errors than models with a toxic compound (blue, 12 models). **(B)** For models with a disconnecting  
186 compound (the best class overall), the smallest regression errors were observed among models in  
187 which the rate of connection cleavage is negligible at compound concentrations below a certain  
188 threshold (e.g. in the step and sigmoid models). **(C)** For models with a connecting compound, the  
189 smallest regression errors were observed among models in which the rate of connection cleavage  
190 can quickly rise with the compound depletion (e.g. also in the step and sigmoid models). Only four  
191 models from each class are shown, for the complete set of models see Figure S6 and Figure S7.

192 We found that the most accurate fitting is achieved by the disconnecting compound models,  
193 where the compound action is near zero when the concentration of the compound is below a  
194 threshold: in step and sigmoid models (Figure 3B) and also in fracture, and in breaking point  
195 models (Figures S4, S6). There is no significant difference between the regression errors  
196 achieved in these four models. The remaining models demonstrate much larger regression  
197 errors, similar to those of control models (constant and proportional), see Table S4.

198 Among the connecting compound models, three out of five best models explicitly feature a  
199 threshold (step, sigmoid, and quadratic concave), see (Figure 3C). Two more models with  
200 similarly good fit do not have an explicit threshold designed into them (inverse and exponent).  
201 Still, all five models share a rapid decrease in filament fragmentation rate at a low compound  
202 concentration, followed by a plateau of low sensitivity to concentration – a feature absent  
203 among poor fit models (constant, linear, quadratic convex), see Figures S5, S7 and Table S5.

204 Altogether, connecting and disconnecting models show that in order to observe patterns  
205 found in the experiments, the rate of filament fragmentation must depend non-linearly on the  
206 compound concentration. In all best fitted models, the fragmentation rate skyrockets at some  
207 moment: either after exceeding a threshold compound concentration for the disconnecting  
208 compound models, or after expiration of the consumed compound for the connecting models.

## 209 **DISCUSSION**

### 210 **Phenotypic heterogeneity in microbial populations**

211 When exposing the unicellular cyanobacterium *Cyanothece* sp. ATCC 51142 to a range of  
212 salinities comparable to conditions it would experience in its native habitat, the intertidal zone,  
213 we observe two distinct microbial lifestyles: the previously described single cell stage (9), and  
214 a newly observed filamentous stage (Figure 1A). At low population densities, the single cell  
215 stage predominates in cultures with higher salinities ( $\geq 90$  mM NaCl), while the filamentous  
216 stage is most prevalent under low-salinity conditions, and the only stage in the populations  
217 cultured in the salinity-free environment. The repeatability and the high rate of the  
218 filamentous stage in the population exclude genetic changes, such as mutation or gene  
219 amplification (14), as the underlying mechanisms for the change in morphology. Moreover,  
220 the co-existence of both morphological stages at the intermediate salinities is indicative of  
221 phenotypic heterogeneity.

222 Phenotypic heterogeneity has been reported for many bacteria and is defined as diverse  
223 phenotypes arising from genetically identical microbes that reside in the same  
224 microenvironment (15). Several molecular mechanisms underpin phenotypic heterogeneity,  
225 such as stochastic state switching, periodic oscillations, cellular age, and cell-to-cell  
226 interactions. Whereas in this study, stochastic state switching can be excluded due to the  
227 exclusiveness of either of both stages in the two extreme environments (0 mM and 300 mM  
228 NaCl), periodic oscillations and cellular age can be excluded when the populations in the  
229 different salinities are compared, as all populations were initiated from the same culture. This  
230 promotes cell-to-cell interactions as the most likely mechanism underpinning the switch  
231 between the two distinct phenotypes. This is confirmed by the outcomes from the experiment,  
232 where the effect of starting population density on lifestyle was investigated. Here, the



233 filamentous stage was only observed at lower population densities ( $\leq 1 \times 10^6$  mL<sup>-1</sup>), whereas at  
234 higher densities only single cells were observed. This indicates that an increase in cell-to-cell  
235 interactions prevents the formation of the filamentous stage. Cell-to-cell interactions could  
236 either happen via direct contact between cells (16), or through indirect means, for example in  
237 response to cues from other cells that are excreted into the medium, e.g. quorum sensing  
238 (17), or through the consumption of nutrients. This was addressed by adding cell-free  
239 supernatants from high-density to low-density cultures, which indeed inhibited filament  
240 formation, thus confirming that filament inhibition is not caused by direct cell-cell interactions.

#### 241 **Different phenotypic lifestyles are stages of a microbial life cycle**

242 While the different microbial lifestyles and transitions between them have been researched in  
243 much detail, this approach only provides a fragmented picture of microbial life cycles that  
244 occur in nature (18). When we follow low-density populations of *Cyanothece* sp. in the no-  
245 salinity environment over time, a microbial life cycle with alternating single cell and  
246 multicellular life stages, can be observed as described for other single-celled bacteria, such  
247 as *Bacillus subtilis* that transition through single cell, filamentous, and dormant life stages (18)  
248 or for experimental populations of *Pseudomonas fluorescens* (19). In the case of *Cyanothece*  
249 sp., 24 hours after initiation of the single-celled culture, filaments can be observed that  
250 constitute the only cell-stage for another 48 hours. Thereafter, within the next 24 hours,  
251 filaments disappear so that single cells are the only stage present in the population. The  
252 disintegration of filaments is an interesting phenomenon, which, as shown for the inhibition of  
253 filament formation, depends upon the presence or absence of compounds in the culture  
254 medium. Moreover, the two cell-free supernatants can be used interchangeably, i.e. while the  
255 filament fragmentor also inhibits filament formation, the filament inhibitor also leads to  
256 filament fragmentation.

257 To learn more about the nature of the compound and about the way filaments transitioned to  
258 single cells, i.e. whether every alternate cell dies or whether cells separate through cleavage  
259 of connection sites, the experimental data was fitted with 32 different models that vary in the  
260 effect of the compound on the filament (cell death or connections cleavage), and in the effect  
261 of the concentration of the cue. As the models that assumed cell death resulted in a worse  
262 fitting than the ones where the cue resulted in the cleavage of connection sites, filaments  
263 likely disintegrate into single cells without cell death.

264 The classic example for phenotypic switching induced by cues in the medium is quorum  
265 sensing (17). The known mechanisms for quorum sensing involve cell-to cell signalling by  
266 molecules called autoinducers. They are involved in a regulation pathway featuring a positive  
267 feedback loop – the more autoinducer molecules are present, the higher is their production  
268 rate (12,13). As a consequence, the kinetic models of quorum sensing feature a bi-stable

269 dynamics: the cell is either on or off. While the precise kinetics and regulation of the  
270 compound lays outside of the scope of our work in the context of this study, the known  
271 kinetics models of quorum sensing is best represented by the step model (Figures S4 and  
272 S5). The sigmoid model is the generalization of the step model and features it as a limiting  
273 case. These two models demonstrate the two best fits in both model families: connecting and  
274 disconnecting compound (Tables S4 and S5).

275 From a theoretical perspective, multicellular life cycles with fission into multiple pieces have a  
276 selective advantage when a fragmentation event is costly in some way (20,21). A typical  
277 mechanism making fragmentation costly is cell death observed in some species of  
278 filamentous cyanobacteria, where specific cells, necridia, undergo programmed cell death,  
279 when releasing hormogonia (motile reproductive filaments) from the mother filament (22).  
280 The modeling results suggest however that cell death does not happen here. The next  
281 alternative is that either production of inhibitor/fragmentor or the response to its high  
282 concentration is costly. Given that the results of the fitting indicate a more complex response  
283 of *Cyanothece* sp. to inhibitor/fragmentor than the simple mass action law, this supports the  
284 hypothesis that some dedicated mechanism, such as quorum sensing, is involved in the  
285 observed dissolution of filaments.

## 286 **Phenotypic plasticity and evolutionary transitions in multicellularity**

287 The environmentally dependent filamentation/fragmentation of *Cyanothece* sp. allows  
288 drawing parallels between the population dynamics observed in our study and a life cycle of  
289 a multicellular organism. The unicellular phenotype observed in the saline environment is  
290 analogous to motile propagules. The process of filamentation in low-salinity conditions  
291 represents the growth of the organism. Finally, the fragmentation of filaments into single cells  
292 is comparable to reproduction resulting from new propagules being released into nature.

293 While there is no evidence that the repeated filamentation and fragmentation occurs under  
294 natural conditions, we can speculate that the observed effect might be at the core of an  
295 environmentally dependent life cycle. Such a hypothetical life cycle would start once single  
296 cells of the marine *Cyanothece* sp. find themselves in a compartment with reduced salinity,  
297 for example a river estuary. There, through filamentation multicellular chains would be  
298 formed until high local densities are reached. Overcrowding would result in the fragmentation  
299 of filaments into independent cells. Given the small size of single cells compared to  
300 multicellular filaments, the newly released single cells are much more likely to be moved  
301 away from the overcrowded environment – either into the sea or to another freshwater  
302 compartment, ready to restart the cycle again.

303 While this is the first report of such an environmentally dependent life cycle for unicellular  
304 cyanobacteria, such life cycles are not only known for bacteria, such as *Bacillus subtilis*,

305 which also alternates between motile single cell and filamentous stages (18). The slime mold  
306 *Dictyostelium discoideum*, for example, exists as single cells under favourable conditions,  
307 which aggregate into a multicellular slug capable of locomotion upon nutrient depletion (23).  
308 Eventually, the slug differentiates into stalk and fruiting body, releasing spores from which  
309 new single cells hatch. Another example is the predominantly unicellular marine  
310 choanoflagellate *Salpingoeca rosetta*, which forms multicellular colonies in the presence of  
311 prey bacteria (24). In all cases, the transition from the unicellular to a multicellular stage is a  
312 response to environmental cues. Moreover, even stages of highly sophisticated and  
313 integrated developmental animal life cycles have been discovered to depend on external  
314 factors and ecological triggers, some of which are based on communication with external  
315 bacteria (25). Theoretical models of life cycle evolution have shown that a changing  
316 environment can lead to the evolution of complex life cycles in which some cells live and  
317 reproduce as unicellular beings, while others form groups (26).

318 While the transition between the different stages of a life cycle might initially be dependent  
319 upon the environment and be based on phenotypic plasticity, recent findings suggest that the  
320 integration of these stages likely is central for the evolutionary transition to multicellularity  
321 (27,28). One could imagine an ancestral plastic response present in the unicellular ancestor  
322 that is co-opted, such as the density dependent switch between single cells and filaments  
323 reported here. In that case, the transition from the predominantly unicellular life cycle with  
324 facultative multicellular stages to an obligate multicellular life cycle might be straightforward.  
325 Given an adequate selective environment, it would simply involve a change from a facultative  
326 to an obligate expression of the underlying genes, for example of the ones that are involved  
327 in filament formation.

328 Even though, this life cycle has been artificially induced in the laboratory, it seems to be  
329 realistic for what is happening in nature. Many habitats are characterised by rapidly changing  
330 environmental conditions, so for example, a unicellular organism isolated in one environment  
331 might possess a completely different phenotype/life stage in another. While it is tempting to  
332 classify organisms based on their phenotypes, it is important to realise that in the laboratory  
333 we often investigate only parts of an organism's life cycle. For studying the transition to  
334 multicellularity, the importance of the morphological and physiological flexibility of the  
335 unicellular ancestor is becoming more and more apparent, for example when studying the  
336 complex life cycles of protozoans (25), which share a common last ancestor with animals or  
337 when comparing experimentally evolved nascent stages of early multicellular life cycles to  
338 the highly differentiated life cycles and cells of the of their closest multicellular relatives.  
339 Thus, at least some (if not all) transitions to differentiated multicellularity might have been a  
340 rewiring from temporal differentiation of life cycle stages to spatial differentiation in  
341 multicellular organisms (29). This poses important questions regarding the ease of such

342 transitions, the ease of reversals to unicellularity, but also regarding our views of the  
343 transition to multicellularity (30). Should we really think about the transition to clonal  
344 multicellularity as the multi-step process that starts with the evolution of undifferentiated  
345 multicellularity getting more complex over evolutionary timescales or rather as a one-step  
346 process starting with a complex unicellular ancestor that directly transitions into a  
347 differentiated multicellular organism?

#### 348 **SUPPLEMENTAL INFORMATION**

349 Supplemental information can be found online at . The simulation code, its results, and data  
350 processing are publicly available at [https://github.com/yuriypichugin/cyanobacteria-filament-](https://github.com/yuriypichugin/cyanobacteria-filament-fragmentation)  
351 [fragmentation](https://github.com/yuriypichugin/cyanobacteria-filament-fragmentation).

#### 352 **ACKNOWLEDGEMENTS**

353 We thank Peter Deines, Caroline Rose and Nancy Weiland-Bräuer for critical comments on  
354 the manuscript. ST was funded by the China Scholarship Council (CSC), Beijing, China. YP  
355 is grateful to the Max Planck Society for generous funding. K.H. thanks the Hamburg Institute  
356 for Advanced Study (HIAS) and the Joachim Herz Foundation for support.

357

#### 358 **AUTHOR CONTRIBUTIONS**

359 ST and KH designed the experiments. ST performed the experiments. YP performed the  
360 theoretical modeling. All authors interpreted the results and wrote the manuscript.

361

#### 362 **DECLARATION OF INTERESTS**

363 The authors declare no competing interests

#### 364 **REFERENCES**

- 365 1. Maynard Smith, J., Szathmary, E. *The Major Transitions in Evolution*. Oxford University  
366 Press; 1997.
- 367 2. Szathmary, E. Toward major evolutionary transitions theory 2.0. *Proc Natl Acad Sci*.  
368 2015;112(33):10104–11.
- 369 3. Bonner, J.T. The origins of multicellularity. *Integr Biol Issues News Rev Publ Assoc Soc*  
370 *Integr Comp Biol*. 1998;1(1):27–36.
- 371 4. Schopf, J.W. Microfossils of the Early Archean Apex chert: new evidence of the  
372 antiquity of life. *Science*. 1993;260(5108):640–6.
- 373 5. Grosberg, R.K., Strathmann, R.R. The evolution of multicellularity: a minor major  
374 transition? *Annu Rev Ecol Evol Syst*. 2007;38:621–54.
- 375 6. Knoll, A.H. *Life on a young planet: the first three billion years of evolution on Earth-*  
376 *updated edition*. Vol. 87. Princeton University Press; 2015.

- 377 7. Claessen, D., Rozen, D.E., Kuipers, O.P., Sogaard-Andersen, L., Van Wezel, G.P.  
378 Bacterial solutions to multicellularity: a tale of biofilms, filaments and fruiting bodies. *Nat*  
379 *Rev Microbiol.* 2014;12(2):115–24.
- 380 8. Herrero, A., Stavans, J., Flores, E. The multicellular nature of filamentous heterocyst-  
381 forming cyanobacteria. *FEMS Microbiol Rev.* 2016;40(6):831–54.
- 382 9. Reddy, K.J., Haskell, J.B., Sherman, D.M., Sherman, L.A. Unicellular, aerobic nitrogen-  
383 fixing cyanobacteria of the genus *Cyanothece*. *J Bacteriol.* 1993;175(5):1284–92.
- 384 10. Tuomi, P., Fagerbakke, K.M., Bratbak, G., Heldal, M. Nutritional enrichment of a  
385 microbial community: the effects on activity, elemental composition, community  
386 structure and virus production. *FEMS Microbiol Ecol.* 1995;16(2):123–34.
- 387 11. Matz, C., Jürgens, K. Interaction of nutrient limitation and protozoan grazing determines  
388 the phenotypic structure of a bacterial community. *Microb Ecol.* 2003;45(4):384–98.
- 389 12. Dockery, J.D., Keener, J.P. A mathematical model for quorum sensing in *Pseudomonas*  
390 *aeruginosa*. *Bull Math Biol.* 2001;63(1):95–116.
- 391 13. Chopp, D.L., Kirisits, M.J., Moran, B., Parsek, M.R. A mathematical model of quorum  
392 sensing in a growing bacterial biofilm. *J Ind Microbiol Biotechnol.* 2002;29(6):339–46.
- 393 14. Darmon, E., Leach, D.R.F. Bacterial genome instability. *Microbiol Mol Biol Rev.*  
394 2014;78(1):1–39.
- 395 15. Ackermann, M. A functional perspective on phenotypic heterogeneity in microorganisms.  
396 *Nat Rev Microbiol.* 2015;13(8):497–508.
- 397 16. Blango, M.G., Mulvey, M.A. Bacterial landlines: contact-dependent signaling in bacterial  
398 populations. *Curr Opin Microbiol.* 2009;12(2):177–81.
- 399 17. Waters, C.M., Bassler, B.L. Quorum sensing: cell-to-cell communication in bacteria.  
400 *Annu Rev Cell Dev Biol.* 2005;21:319–46.
- 401 18. van Gestel, J., Ackermann, M., Wagner, A. Microbial life cycles link global modularity in  
402 regulation to mosaic evolution. *Nat Ecol Evol.* 2019;3(8):1184–96.
- 403 19. Hammerschmidt, K., Rose, C.J., Kerr, B., Rainey, P.B. Life cycles, fitness decoupling  
404 and the evolution of multicellularity. *Nature.* 2014;515(7525):75–9.
- 405 20. Pichugin, Y., Peña, J., Rainey, P.B., Traulsen, A. Fragmentation modes and the  
406 evolution of life cycles. *PLOS Comput Biol.* 2017;13(11):e1005860.
- 407 21. Pichugin, Y., Traulsen, A. Evolution of multicellular life cycles under costly  
408 fragmentation. *PLOS Comput Biol.* 2020;16(11):e1008406.
- 409 22. Nürnberg, D.J., Mariscal, V., Parker, J., Mastroianni, G., Flores, E., Mullineaux, C.W.  
410 Branching and intercellular communication in the Section V cyanobacterium  
411 *Mastigocladus laminosus*, a complex multicellular prokaryote. *Mol Microbiol.*  
412 2014;91(5):935–49.
- 413 23. Bonner, J.T. *Cellular slime molds*. Princeton University Press; 2015.
- 414 24. Fairclough, S.R., Dayel, M.J., King, N. Multicellular development in a choanoflagellate.  
415 *Curr Biol.* 2010;20(20):R875–6.

- 416 25. Ros-Rocher, N., Perez-Posada, A., Leger, M.M., Ruiz-Trillo, I. The origin of animals: an  
417 ancestral reconstruction of the unicellular-to-multicellular transition. *Open Biol.*  
418 2021;11(2):200359.
- 419 26. Pichugin, Y., Park H. J., Traulsen, A. Evolution of simple multicellular life cycles in  
420 dynamic environments. *J R Soc Interface.* 2019;16(154):20190054.
- 421 27. Brunet, T., King, N. The origin of animal multicellularity and cell differentiation. *Dev Cell.*  
422 2017;43(2):124–40.
- 423 28. Staps, M., van Gestel, J., Tarnita, C.E. Emergence of diverse life cycles and life  
424 histories at the origin of multicellularity. *Nat Ecol Evol.* 2019;3(8):1197–205.
- 425 29. Bourrat, P., Doucier, G., Rose, C.J., Rainey, P.B., Hammerschmidt, K. Beyond Fitness  
426 Decoupling: Tradeoff-breaking during Evolutionary Transitions in Individuality. *bioRxiv.*  
427 2021; <https://doi.org/10.1101/2021.09.01.458526>.
- 428 30. Rose, C.J., Hammerschmidt, K. What do we mean by multicellularity? The Evolutionary  
429 Transitions Framework provides answers. *EcoEvoRxiv.* 2021;  
430 <https://doi.org/10.32942/osf.io/fmw37>.

431

432

## 433 **METHOD DETAILS**

### 434 **Bacterial strain and culture conditions**

435 *Cyanothece* sp. ATCC 51142 was obtained from the ATCC culture collection. Cells were  
436 grown photoautotrophically at continuous light with a light intensity of  $30 \mu\text{mol m}^{-2} \text{s}^{-1}$  in liquid  
437 culture at  $30^\circ\text{C}$ . To evaluate the effect of salinity on the morphology of *Cyanothece* sp., we  
438 carried out a growth experiment, where we supplemented BG11 media with NaCl. In total,  
439 we tested three replicates in each of the eleven NaCl concentrations (0, 30, 60, 90, 120, 150,  
440 180, 210, 240, 270, 300 mM) with a total volume of 10 mL. We recorded the population  
441 composition 48 hours after start of the experiment. To test for the effect of starting population  
442 density on the morphology of *Cyanothece* sp., we created a gradual series of starting  
443 population densities ( $5 \times 10^5$ ,  $10^6$ ,  $2 \times 10^6$ ,  $3 \times 10^6$ ,  $4 \times 10^6$ ,  $5 \times 10^6$  cells/mL, a total volume of 10 mL),  
444 with three replicates per condition. We again recorded the population composition 48 hours  
445 after start of the experiment.

446

### 447 **Supernatant test**

448 To test whether the phenotypic switch is mediated by nutrient depletion, fresh culture  
449 medium (BG11) was diluted with filament inhibitor, filament fragmentor and ddH<sub>2</sub>O, creating  
450 a gradual series of BG11 ratios (0%, 20%, 40%, 60%, 80%, 100%), within a total volume of 1  
451 mL. Low-density single cells ( $5 \times 10^5$  cells/mL) were cultured in all combinations in the 24-well  
452 plate, with three replicates for each combination. After 48 hours, the morphology of the cells  
453 within each replicate was observed under the microscope and the presence of filaments was  
454 recorded.

455 To investigate whether filament fragmentation depends on cellular age, single cells were  
456 grown in 10 mL BG11 in tissue culture flasks for 72 h, after which filament formation was  
457 confirmed under the microscope. Cultures were gently mixed, and 20  $\mu\text{L}$  of the filamentous  
458 *Cyanothece* sp. population was transferred to 980  $\mu\text{L}$  of fresh BG11 medium. As a control, 1  
459 mL of culture without the addition of fresh medium was grown in parallel. Each treatment was  
460 carried out with three replicates. After 24 h, replicate populations ( $n=3$  each) were quantified.

461 To differentiate whether the morphology changes from single cells to filaments and back  
462 have been induced by direct cell-cell contact or through (excreted) compounds in the media,  
463 we harvested two supernatants: (i) filament inhibitor, and (ii) filament fragmentor. We created  
464 the filament inhibitor supernatant by setting up replicate cultures ( $n=3$ ) with high starting cell  
465 densities ( $5 \times 10^6$  cells/mL) in BG11 media. We let them grow for 24 hours under the  
466 conditions described above, after which we centrifuged samples (at  $20 \times g$  for 3 minutes).  
467 Thereafter we processed the supernatant through a  $0.22 \mu\text{m}$  filter (Syringe filter, membrane:  
468 PES) to exclude cyanobacterial cells. The process for harvesting the filament fragmentor  
469 supernatant was the same, only that the culture was initiated differently. Here, low-density

470 cultures ( $5 \times 10^5$  cells/mL) ( $n=3$ ) were set up in BG11 and closely monitored. We harvested the  
471 supernatant directly after filament fragmentation occurred. Directly after harvesting the  
472 supernatants, we set up an experiment, where we exposed replicate populations ( $n=3$  each)  
473 of single cells ( $5 \times 10^5$  cells/mL) and 48-hours-old filaments to either filament inhibitor or  
474 filament fragmentor supernatants or to fresh BG11 media. To achieve this, 1 mL unicellular  
475 culture (exponential phase) or 1 mL of 48-hours-old filaments were centrifuged, and the  
476 resultant supernatants were discarded. Thereafter cells were resuspended in 1 mL of either  
477 filament fragmentor supernatant, filament inhibitor supernatant, or fresh BG11, respectively.  
478 We recorded the population composition 24 hours after start of the experiment.

#### 479 **Quantification of population density and composition**

480 Population density and composition was quantified with a cell counting chamber (Neubauer  
481 improved, depth: 0.1 mm) from which digital photographs were taken (camera AxioCam  
482 MRR3 mounted to the microscope ZEISS Imager.M2m). More specifically, from each  
483 replicate population (total volume of 1mL) 1  $\mu$ L was assayed and cells within the final volume  
484 were calculated with the formula: Cells in 1 $\mu$ l = (number of cells in a main square) (1 $\mu$ l)  
485 /0.004. Images were counted manually using the software ImageJ, and classified into four  
486 categories: single cells, 4-celled filaments, 8-celled filaments and 16-celled filaments.

#### 487 **Statistical analysis**

488 Sample size was chosen to maximise statistical power and ensure sufficient replication.  
489 Assumptions of the tests, that is, normality and equal distribution of variances, were visually  
490 evaluated. Non-significant interactions were removed from the models. All tests were two-  
491 tailed. Effects were considered significant at the level of  $P < 0.05$ . All statistical analyses  
492 were performed with JMP 9. Graphs were produced with R Studio Version 1.4.1564 and  
493 Python Matplotlib library.

#### 494 **Theoretical model**

495 In the model, we consider a population composed of filaments of different length. After  
496 division, cells always stay together, increasing the length of the filament. Cell divisions in  
497 each filament occur synchronously, so the filament length doubles at each division event.  
498 However, filaments divide independently from each other, hence division events among  
499 different filaments are not synchronized. The rate of cell division is density dependent -- the  
500 more cells are present in the population, the slower is cell division:

$$W_{\text{eff}}(\mathbf{x}) = W_0 \left( 1 - \frac{\sum_i i x_i}{K} \right), \quad (1)$$

501 where  $W_{\text{eff}}(\mathbf{x})$  is the division rate of cells in the population  $\mathbf{x}$ ,  $W_0$  is the maximal division rate,  
502  $x_i$  is the number of filaments of the length  $i$ , and hence,  $\sum_i i x_i$  is the total number of cells in  
503 the population,  $K$  is the maximal number of cells that can be sustained in the population



504 (carrying capacity). The maximal possible length of the filament in the model was limited to  
 505 32 cells, which is larger than any empirically observed filament. Filaments that reach that  
 506 maximal size stop dividing.

507 We assume that filaments fragment due to the changes in the environment caused by the  
 508 presence of cells. Here we consider three families of models. In **toxic compound** models  
 509 cells produce a compound causing cell death. In **disconnecting compound** models cells  
 510 produce a compound causing connections cleavage. In **connecting compound** models cells  
 511 consume a compound that underlies filamentation. In both disconnecting and connecting  
 512 models, the fragmentation occurs via loss of cell connections but in the first case cells  
 513 produce the mediating compound, while in the second case they consume it.

514 In the disconnecting and toxic compound models, cells produce a compound  $T$ , which  
 515 causes filament fragmentation. Each cell produces the compound with the unit rate.  
 516 Produced compound decays with the rate  $D_{\text{comp}}$ . Hence, the compound dynamics is given by

$$\frac{dT}{dt} = \sum_i i x_i - D_{\text{comp}} T, \quad (2)$$

517 where the first term describes the production of compound by cells, and the second term  
 518 describes the compound decay. The rate of compound production is set to one without loss  
 519 of generality, as it is just a scaling factor for non-observed compound concentration.

520 In the connecting compound models, a fresh media initially contains a unit concentration of a  
 521 compound, while cells consume the compound. Hence, the compound dynamics are  
 522 governed by a different law

$$\frac{dT}{dt} = -D_{\text{cons}} T \sum_i i x_i, \quad (3)$$

523 where  $D_{\text{cons}}$  is the rate at which a single cell consumes the compound.

524 In all cases, population dynamics are described by the set of differential equations

$$\frac{dx_i}{dt} = \sum_j A_{ij}(\mathbf{x}, T) x_j, \quad (3)$$

525 where the projection matrix  $A_{ij}(\mathbf{x}, T)$  shows the rate at which filaments of length  $i$  emerge  
 526 from the filaments of length  $j$  by means of growth and fragmentation.

527 For the connecting and disconnecting compound models, filaments fragment by losing  
 528 connections between cells. Hence, the elements of this matrix are

$$A_{ij}(\mathbf{x}, T) = \begin{cases} -W_{\text{eff}}(\mathbf{x}) - (i-1)E(T), & \text{if } i = j \\ W_{\text{eff}}(\mathbf{x}), & \text{if } i = 2j \\ 2E(T), & \text{if } i < j \\ 0, & \text{otherwise} \end{cases} \quad (4)$$

529 There, the first line describes the disappearance of filaments due to the growth or  
530 fragmentation, the second line describes the emergence of twice-longer filaments at each  
531 growth event, and the third line describes the emergence of shorter filaments after  
532 fragmentation.  $E(T)$  is the rate of effect of compound at the concentration  $T$ . In the  
533 disconnecting compound models,  $E(T)$  is a monotonically increasing function – more  
534 compound leads to higher rate of connections loss. In the connecting compound models,  $E(T)$   
535 is a monotonically decreasing function – less compound leads to less stable connections.  
536 For toxic compound models, filaments fragment whenever an internal cell dies. Hence, the  
537 elements of this matrix are

$$A_{ij}(\mathbf{x}, T) = \begin{cases} -W_{\text{eff}}(\mathbf{x}) - iE(T), & \text{if } i = j \\ W_{\text{eff}}(\mathbf{x}), & \text{if } i = 2j \\ 2E(T), & \text{if } i < j \\ 0, & \text{otherwise} \end{cases} \quad (5)$$

538 Note that the only difference between Eqs.(4) and (5) is the coefficient before  $E(T)$  in the first  
539 line. This represents that in a filament of  $i$  cells, there is  $i-1$  connections, which can be  
540 severed (if the fragmentation is due to the cleavage of connections) but  $i$  cells that can die (if  
541 the fragmentation is due to the death of cells).

542 For each family, we consider a number of models of the compound effect  $E(T)$ , see Figures  
543 S4 and S5 and Tables S2 and S3. There are 32 models in total. In each family, two control  
544 models represent situations, where the mechanism of the compound action is straightforward:  
545 the proportional model assumes a mass action law of the interaction between the compound  
546 and cells, the constant model assumes a spontaneous fragmentation of filaments, i.e. the  
547 compound plays no role. Other models represent situations, where the compound acts on  
548 filaments in a more complicated way.

## 549 **Data fitting and regression results**

550 Four series of experiments are taken into account in the simulations. The first data set is the  
551 population composition at different starting densities (Figure 1B). The second data set is the  
552 population composition over time (Figure 1C). The third data set is the filament elongation  
553 test (Figure S3). The fourth data set is the investigation of the supernatant effects (Figure 2).  
554 For each tested combination of parameters, the simulations imitating experimental protocols  
555 were conducted.

556 To simulate the experiment shown in Figure 1B, the population was initialized with solitary  
557 cells at given concentrations and the population composition after 48 hours recorded for  
558 comparison with experimental observations. To simulate the experiment shown on Figure 1C,  
559 the population was initialized with solitary cells at the given concentration and the population

560 compositions at time points 24, 48, 72, 96, and 120 hours after initialization were recorded.  
561 To simulate the experiment shown on Figure 2, first, the population was initialized with high  
562 density (filamentation inhibitor), or low density (fragmentation inducer) of solitary cells, and  
563 simulated for 24 or 72 hours, respectively. Then, the concentration of the compound was  
564 sampled and used in the second simulation series, initialized with populations, given by  
565 records at 0 hours in each of the sub-experiments. In each case, the composition after 24  
566 hours was recorded. To simulate the experiment shown in Figure S3, the population was  
567 initialized with the record given for 0 hours and the population state after 48 hours was  
568 recorded.

569 In each simulation, the mean square deviation between the experimentally observed and  
570 numerically simulated population composition was computed. Minimization of this value by  
571 adjusting growth and fragmentation parameters was the target of the fitting.

572 The experimental data has been fitted with each of 32 numerical models (see Tables S2 and  
573 S3 for definitions). The initial values of model parameters have been drawn randomly, so  
574 different runs of optimization ended at different points in the parameters space. To  
575 compensate for that, 250 independent optimization runs were computed for each model.

576 Regression errors were scaled by the error provided by the static population. This means  
577 that the fitting error provided by the population, which neither grows nor dies and is not  
578 affected by the compound, is equal to one. The hypothesis of a static scenario is clearly  
579 incorrect; therefore all fitting results with regression errors above one were discarded from  
580 the further analysis as completely unrealistic.

581 All toxic compound models demonstrated much larger regression errors than (dis-)  
582 connecting compound models (Figure 3A and Table S4). Among disconnecting models, four  
583 models demonstrated similar and low minimal regression errors (0.15 – 0.17): step, sigmoid,  
584 fracture, and breaking point. Quadratic model has shown the minimal error around 0.217.  
585 The remaining seven models (constant, proportional, linear, top-capped, bottom-capped,  
586 Michaelis-Menten, and saturating exponent) resulted in larger errors (0.26 – 0.29), see  
587 Figure S6 and Table S4. Among connecting compound models, the lowest regression errors  
588 (0.20 – 0.22) were observed for models capable to demonstrate a sudden increase in  
589 fragmentation rate at low compound concentrations (step, sigmoid, exponent, inverse,  
590 quadratic concave). At the same time, models in which the fragmentation rate increased  
591 gradually with compound loss (constant, linear, quadratic convex) resulted in larger  
592 regression errors (0.23 – 0.30), see Figure and S7, and Table S5.

## **Supplemental Information**

### **Phenotypic plasticity, life cycles, and the evolutionary transition to multicellularity**

**Si Tang, Yuriy Pichugin, and Katrin Hammerschmidt**

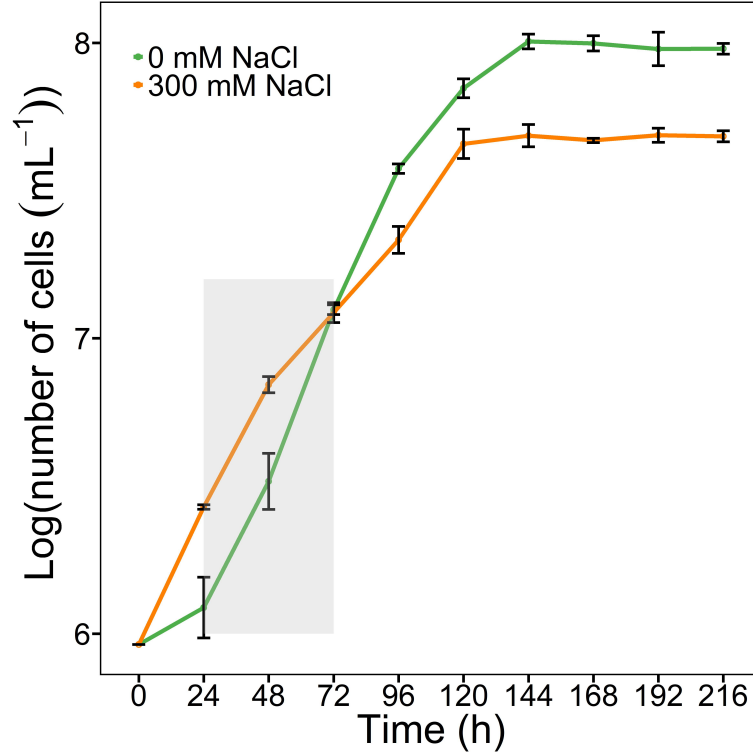

**Figure S 1.** Comparison of the growth trajectory over time in batch culture in 10 mL BG11 medium with 0 mM and 300 mM NaCl. Grey area indicate the time period when filaments were observed in medium with 0 mM NaCl. The shortest generation time in freshwater is  $G_{0\text{ mM}} = 15.2$  hours (from 72h to 96h), while the shortest generation time in the highest salinity is  $G_{300\text{ mM}} = 17.5$  hours (from 24h to 48h).

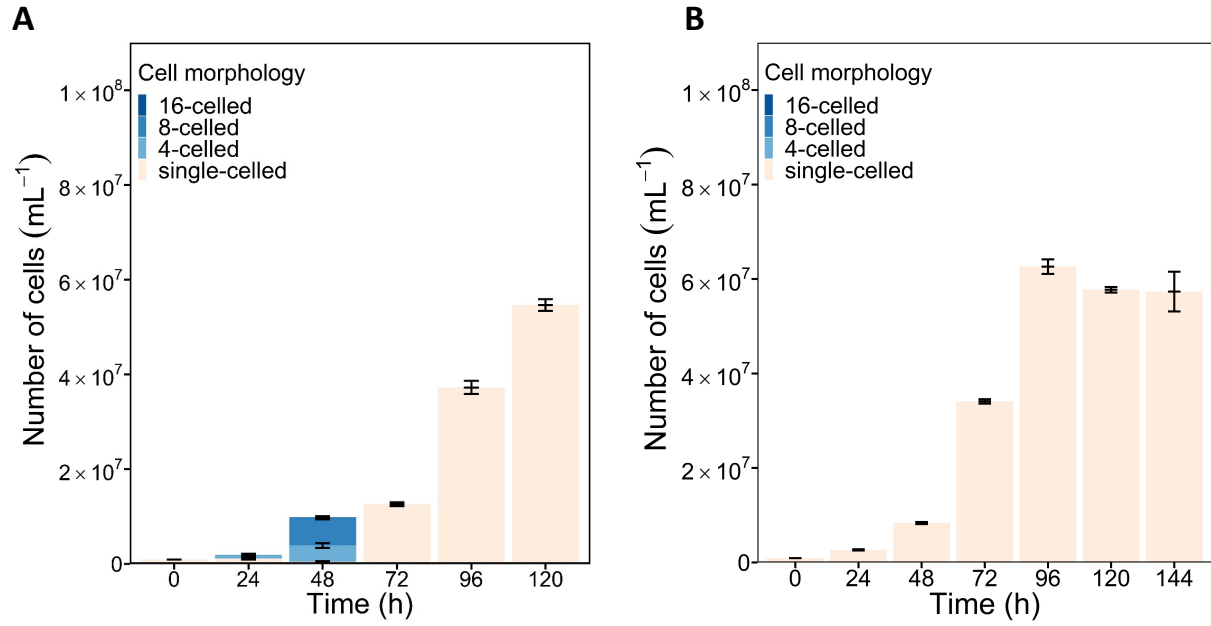

**Figure S2. Population dynamics over time in 1 mL volume (24-well plates) in BG11 (A) and in BG11 with 300 mM added NaCl (B).**

|                     | BG11 ratio |     |     |     |     |    |
|---------------------|------------|-----|-----|-----|-----|----|
|                     | 100%       | 80% | 60% | 40% | 20% | 0% |
| ddH <sub>2</sub> O  | +          | +   | +   | +   | +   | -  |
| Filament fragmentor | +          | +   | +   | -   | -   | -  |
| Filament inhibitor  | +          | +   | -   | -   | -   | -  |

**Table S1. The morphology of *Cyanothece* sp. is dependent on the composition of the medium.** Fresh culture medium (BG11) was added to ddH<sub>2</sub>O and both supernatants, creating BG11 ratios from 0 – 100% with 20% increments. The emergence of the filamentous morphology was recorded after 48 hours, starting with single cells of *Cyanothece* sp. in each dilution treatment. “+” represents filament occurrence; “-“ represents no filament occurrence. While 20% of BG11 in ddH<sub>2</sub>O provided sufficient nutrients for filament formation, 60-80% of the BG11 was necessary to dilute the filament fragmentor/inhibitor medium before filaments were observed.

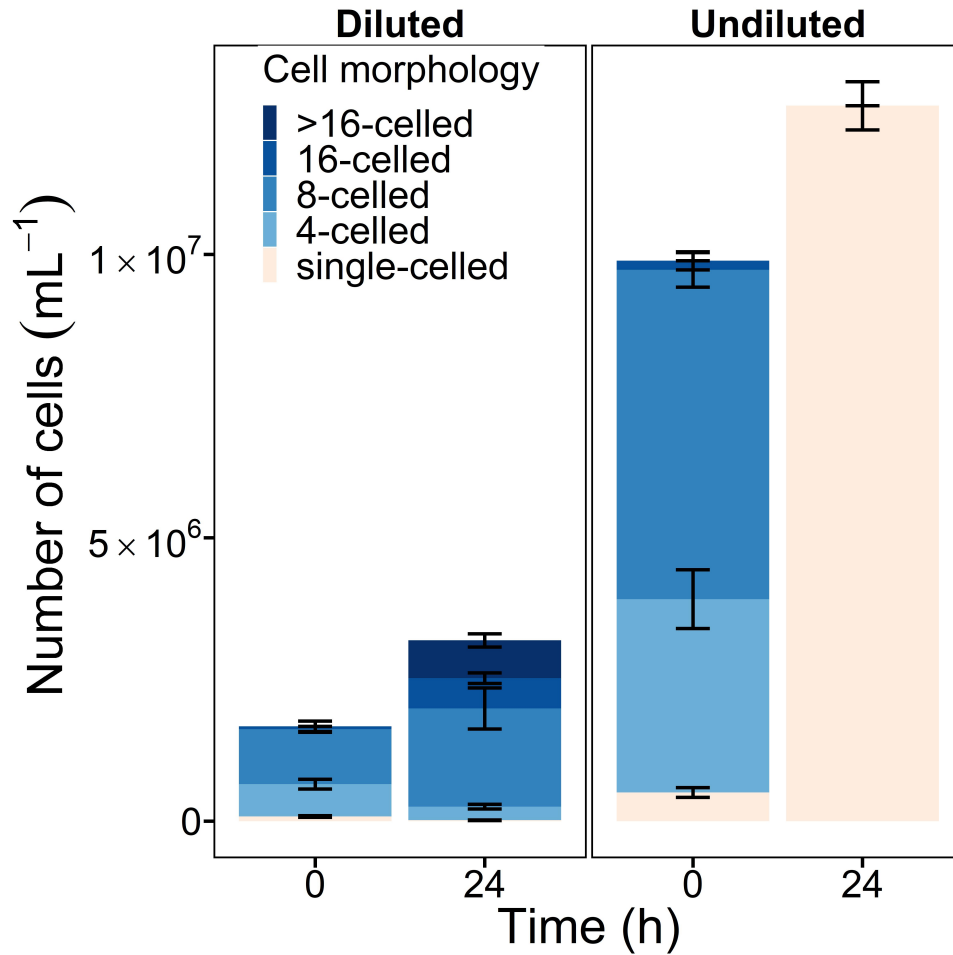

**Figure S3. Population composition after the transfer of 72h-old filaments to new medium (left) in contrast to the original population (both in BG11 without added NaCl).** When diluted, filaments kept growing and increased in length, indicated by the observation of filaments of longer than 16 cells in length and by a significantly higher proportion of 8-celled filaments, in contrast to the original culture, where 24 hours later only single cells were observed. Error bars represent standard deviation of each sub-bar (n=3).



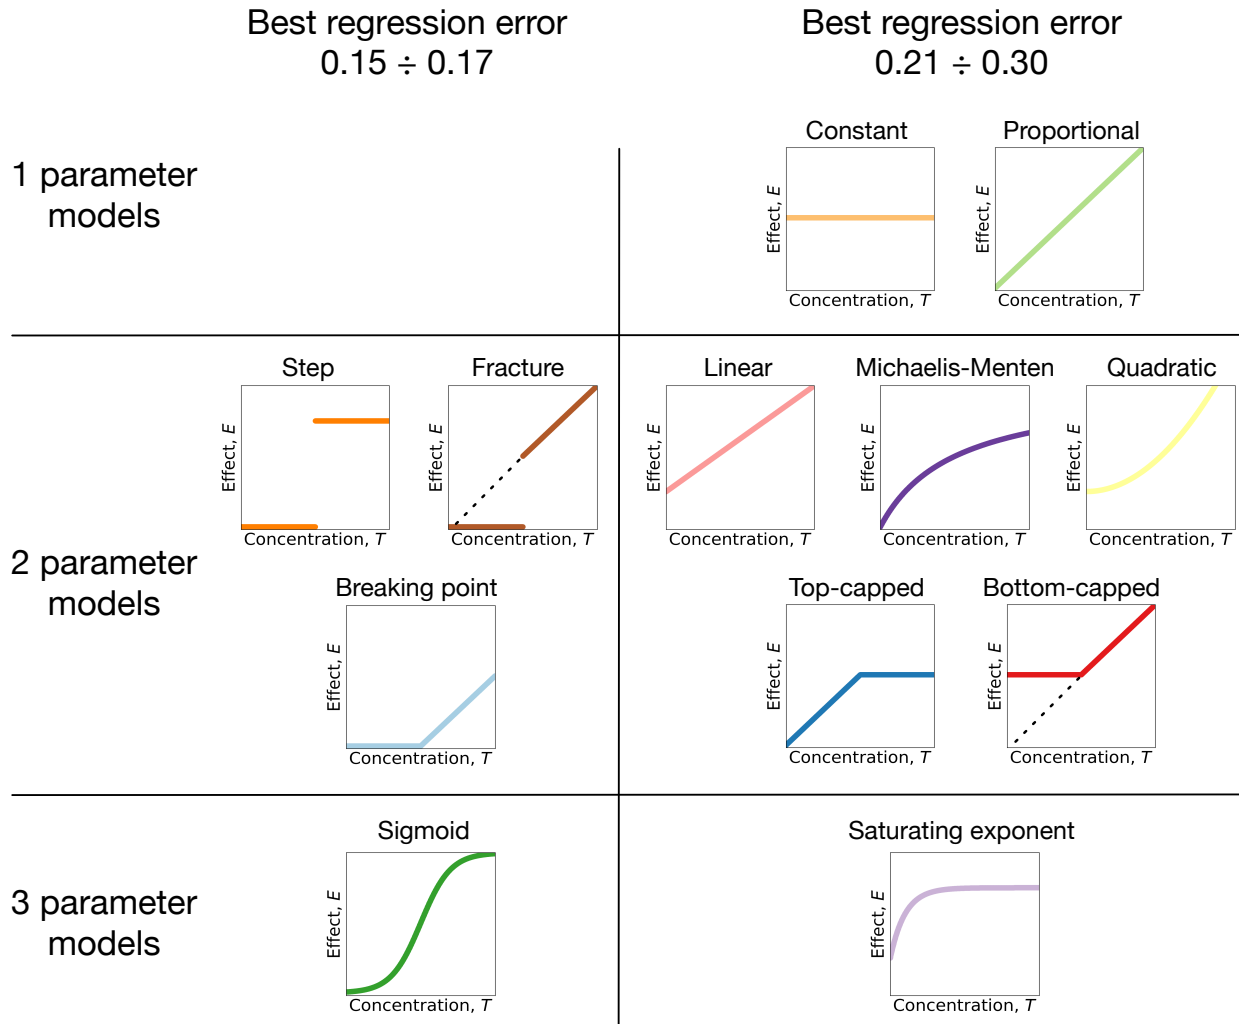

**Figure S4. Models of the acting substance concentration effect in the disconnecting and toxic compound models.** We consider twelve models of the relationship between acting substance concentration and its effect on the filaments. Two models have a single parameter each and serve as a control. Eight models have two parameters. Two remaining models have three parameters each, see Table S2 for details. Regression errors are shown for the disconnecting compound models. There, four models: step, fracture, breaking point, and sigmoid have shown much smaller regression errors than other models.

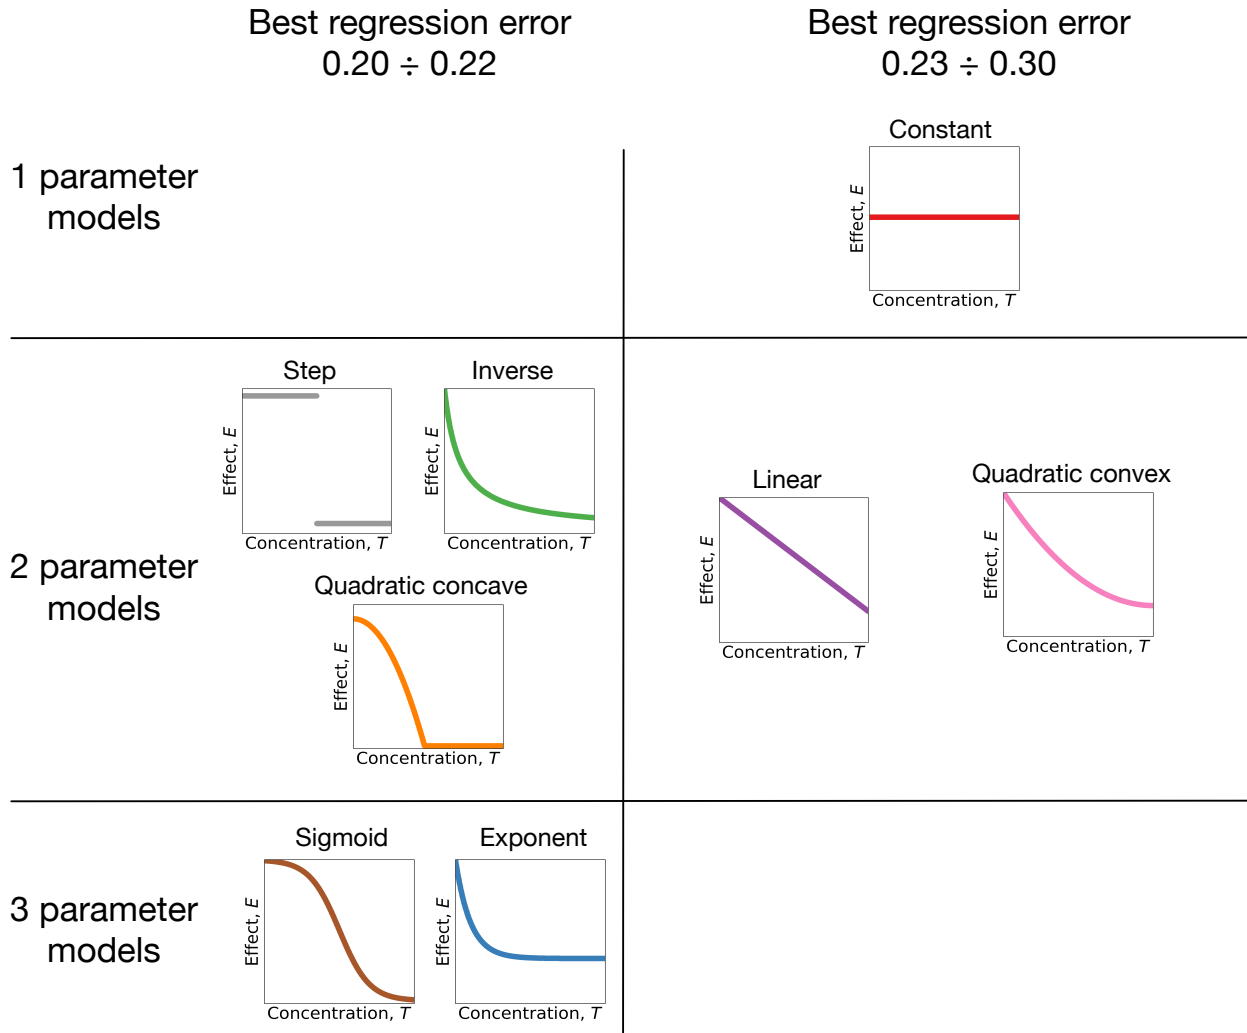

**Figure S5. Models of the acting substance concentration effect in the connecting compound models.** We consider eight models of the relationship between acting substance concentration and its effect on the filaments. One model has a single parameter and serves as a control. Five models have two parameters. Two remaining models have three parameters each, see Table S3 for details. There, five models: step, inverse, quadratic concave, exponent, and sigmoid have similar small regression errors.

**Table S2. Action law E(T) in models used in the toxic and disconnecting compound model families.**

| <b>Model of the acting substance concentration effect</b> | <b>Law of action</b>                                                            |
|-----------------------------------------------------------|---------------------------------------------------------------------------------|
| 1 parameter models                                        |                                                                                 |
| Constant                                                  | $E(T) = E_0$                                                                    |
| Proportional                                              | $E(T) = \alpha T$                                                               |
| 2 parameter models                                        |                                                                                 |
| Linear                                                    | $E(T) = \alpha T + E_0$                                                         |
| Step                                                      | $E(T) = \begin{cases} 0, & T < T_0 \\ E_0, & T > T_0 \end{cases}$               |
| Fracture                                                  | $E(T) = \begin{cases} 0, & T < T_0 \\ \alpha T, & T > T_0 \end{cases}$          |
| Breaking point                                            | $E(T) = \begin{cases} 0, & T < T_0 \\ \alpha(T - T_0), & T > T_0 \end{cases}$   |
| Michaelis-Menten                                          | $E(T) = E_0 \frac{T}{T + T_0}$                                                  |
| Quadratic                                                 | $E(T) = \left(\frac{T}{T_0}\right)^2 + E_0$                                     |
| Top-capped                                                | $E(T) = \begin{cases} \alpha T, & T < T_0 \\ \alpha T_0, & T > T_0 \end{cases}$ |
| Bottom-capped                                             | $E(T) = \begin{cases} \alpha T_0, & T < T_0 \\ \alpha T, & T > T_0 \end{cases}$ |
| 3 parameter models                                        |                                                                                 |
| Sigmoid                                                   | $E(T) = \frac{E_0}{1 + e^{-\alpha(T-T_0)}}$                                     |
| Saturating exponent                                       | $E(T) = E_{\max} - (E_{\max} - E_{\min})e^{-\alpha T}$                          |

**Table S3. Action law E(T) in models used in the connecting compound models family.**

| <b>Model of the acting substance concentration effect</b> | <b>Law of action</b>                                              |
|-----------------------------------------------------------|-------------------------------------------------------------------|
| 1 parameter models                                        |                                                                   |
| Constant                                                  | $E(T) = E_0$                                                      |
| 2 parameter models                                        |                                                                   |
| Linear                                                    | $E(T) = \alpha(1 - T) + E_0$                                      |
| Step                                                      | $E(T) = \begin{cases} E_0, & T < T_0 \\ 0, & T > T_0 \end{cases}$ |
| Quadratic convex                                          | $E(T) = E_0 + \alpha(1 - T)^2$                                    |
| Quadratic concave                                         | $E(T) = \max(0, E_0 - \alpha T^2)$                                |
| Inverse                                                   | $E(T) = \frac{E_0}{1 + \frac{T}{T_0}}$                            |
| 3 parameter models                                        |                                                                   |
| Sigmoid                                                   | $E(T) = \frac{E_0}{1 + e^{\alpha(T-T_0)}}$                        |
| Decaying exponent                                         | $E(T) = E_{\max} + (E_{\max} - E_{\min})e^{-\alpha T}$            |

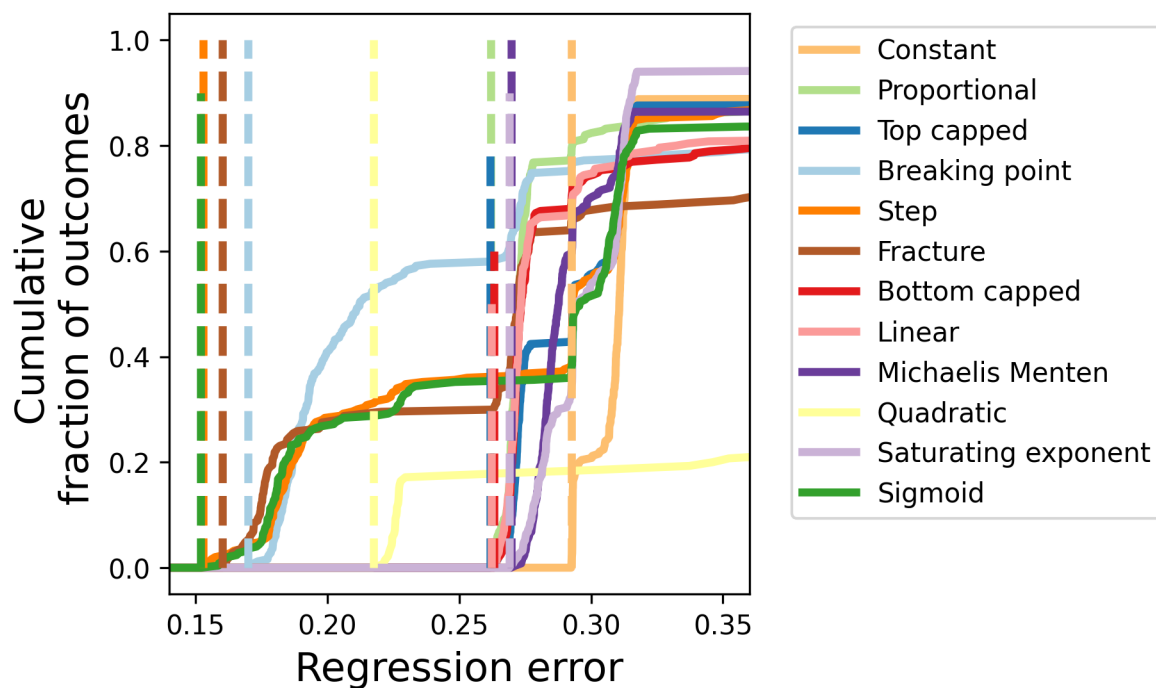

**Figure S6. Cumulative distribution functions and the minimal regression errors obtained for each of twelve disconnecting compound models.** Studied models can be classified into two groups: models with a good fit having minimal regression errors below 0.17, and models with worse fit, for which the minimal regression error is above 0.21 (can be increased to 0.26 if quadratic model is dropped), see also Table S4. Plots show sample cumulative distribution functions of regression errors from 250 independent optimizations for each model. Dashed lines represent the minimal regression error in each model.

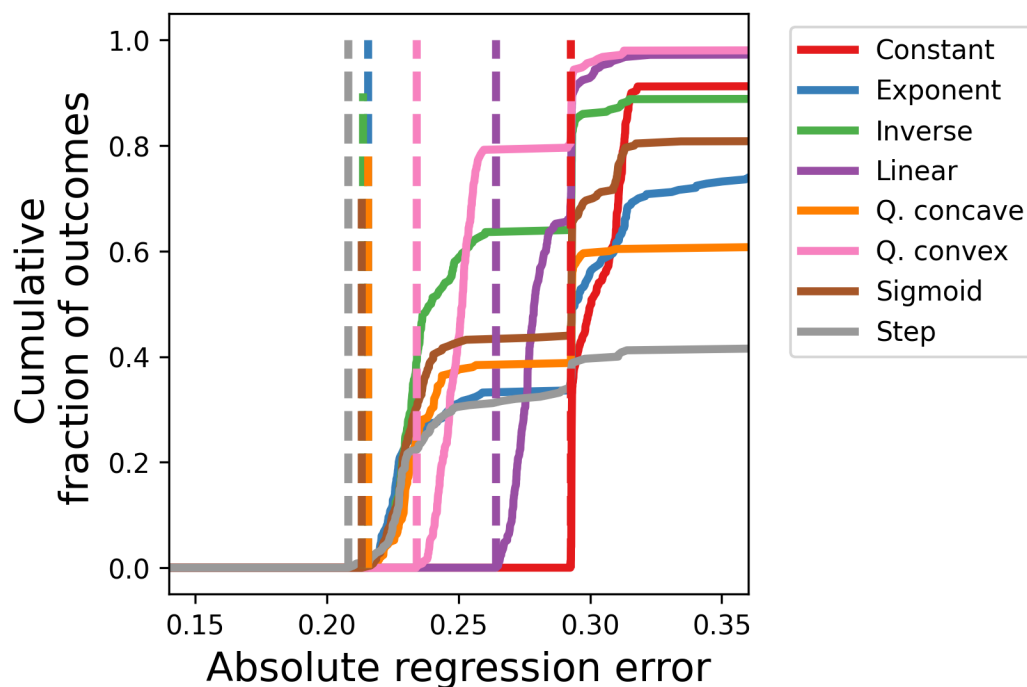

**Figure S7. Cumulative distribution functions and the minimal regression errors obtained for each of the eight connecting compound models.** Studied models can be classified into two groups: models with a good fit having minimal regression errors around 0.21, and models with worse fits, for which the minimal regression error is above 0.22, see also Table S5. Plots show sample cumulative distribution functions of regression errors from 250 independent optimizations for each model. Dashed lines represent the minimal regression error in each model.

**Table S4. Minimal regression errors obtained for the disconnecting and toxic compound models across 250 independent optimizations.** Models are sorted by the minimal regression error in the disconnecting compound family. Models with the highest quality fitting are highlighted.

| <b>Models</b>       | <b>Disconnecting compound regression error</b> | <b>Toxic compound regression error</b> |
|---------------------|------------------------------------------------|----------------------------------------|
| Sigmoid             | 0.152                                          | 0.583                                  |
| Step                | 0.153                                          | 0.594                                  |
| Fracture            | 0.160                                          | 0.721                                  |
| Breaking point      | 0.170                                          | 0.724                                  |
| Quadratic           | 0.217                                          | 0.583                                  |
| Proportional        | 0.262                                          | 0.732                                  |
| Linear              | 0.262                                          | 0.596                                  |
| Top-capped          | 0.262                                          | 0.593                                  |
| Bottom-capped       | 0.263                                          | 0.613                                  |
| Michaelis-Menten    | 0.270                                          | 0.598                                  |
| Saturating exponent | 0.269                                          | 0.560                                  |
| Constant            | 0.292                                          | 0.590                                  |

**Table S5. Minimal regression errors obtained for connecting compound models across 250 independent optimizations.** Models with the highest quality fitting are highlighted.

| <b>Models</b>     | <b>Connecting compound regression error</b> |
|-------------------|---------------------------------------------|
| Step              | 0.208                                       |
| Sigmoid           | 0.213                                       |
| Inverse           | 0.214                                       |
| Quadratic concave | 0.216                                       |
| Exponent          | 0.216                                       |
| Quadratic convex  | 0.234                                       |
| Linear            | 0.264                                       |
| Constant          | 0.292                                       |



### **Text S3. Comparison of our study to the cyanobacterial filament fragmentation model by Rossetti et al (2011)**

A model of filament fragmentation is also described in Rossetti et al (2011). Their model can be considered as a specific limited case of our set of models. Both our and Rossetti et al models examine growing populations of linear filaments and share the same logistic dependence of the cell division rate from the cell density. However, the model of Rossetti et al includes only filament fragmentation due to cell death, while our model set also includes the mechanism of connection loss.

Another difference between the models is that in our case, cell death is caused by the compound produced by cells; while in the model of Rossetti et al the rate of cell death depends on cell density. In both cases, more cells in a population results in a larger death rate but the model presented here features a reactivity: a sudden increase in cell count does not cause an immediate increase in death rate; instead the death rate will steadily rise with the accumulation of the compound. This difference is of principal importance: the model of Rossetti et al is unable to recover the results of supernatant experiments presented in Fig. 2 – the media plays no role in that model and it is impossible to observe high rates of filaments fragmentation at low cell densities. Nevertheless, the design of the cell death from the model of Rossetti et al can be formally recovered by our models set by choosing the proportional model of compound action (see Table S2 and Fig. S2), plus setting both compound decay rate  $D_{\text{comp}}$ , and compound toxicity  $\alpha$  to very large values. With a high compound decay rate, the equilibration of the compound concentration will occur rapidly, so the death rate will closely follow the cell density. Since a high decay rate also means low overall concentrations of compound, to have any significance, the toxicity must also be high. With this set up our model will behave identically to the model of Rossetti et al, however by doing so, the choice of the compound action mechanism, the model of the compound action, and even the parameter values would be far from optimal.

### **SUPPLEMENTAL REFERENCES**

Rossetti, V., Filippini, M., Svercel, M., Barbour, A.D., Bagheri, H.C. Emergent multicellular life cycles in filamentous bacteria owing to density-dependent population dynamics. *J R Soc Interface*. 2011;8(65):1772–84.
